# Supplementary material
Source: PubMed Central journal article supplement (PMC5130338)
Supplement: NIHMS830509-supplement-supplementary_tables.pdf [file NIHMS830509-supplement-supplementary_tables.pdf]

Table S1: Age induced decline in the expression of DNA DSB repair gene expression

| <b>Ages</b>   | All Samples | $\leq 35$ | $\geq 36$ |
|---------------|-------------|-----------|-----------|
| <b>BRCA1</b>  |             |           |           |
| r squared     | 0.401       | 0.1068    | 0.006     |
| slope         | -4.2163     | -4.0292   | -0.9502   |
| t             | -3.8381     | -1.2466   | -0.1897   |
| p             | 0.001       | 0.2345    | 0.8558    |
| r correlation | -0.6333     | -0.3268   | -0.0772   |
| <b>BRCA2</b>  |             |           |           |
| r squared     | 0.0253      | 0.0011    | 0.4201    |
| slope         | -0.0171     | -0.0089   | -0.0161   |
| t             | -0.7559     | -0.1218   | -2.0849   |
| p             | 0.75        | 0.9049    | 0.0822    |
| r correlation | -0.1591     | -0.0338   | -0.6482   |
| <b>ATM</b>    |             |           |           |
| r squared     | 0.1758      | 0.0086    | 0.5769    |
| slope         | -4.4356     | 2.0796    | -10.3118  |
| t             | -2.1664     | 0.3361    | -2.8603   |
| p             | 0.01        | 0.7422    | 0.0288    |
| r correlation | -0.4193     | 0.0928    | -0.7595   |
| <b>MRE11</b>  |             |           |           |
| r squared     | 0.2053      | 0.0233    | 0.5253    |
| slope         | -0.5353     | -0.3312   | -2.743    |
| t             | -2.3839     | -0.5564   | -2.5769   |
| p             | 0.05        | 0.5871    | 0.0419    |
| r correlation | -0.4531     | -0.1525   | -0.7248   |
| <b>RAD51</b>  |             |           |           |
| r squared     | 0.2474      | 0.0005    | 0.6446    |
| slope         | -0.4241     | 0.037     | -1.4106   |
| t             | -2.6275     | 0.0755    | -3.299    |
| p             | 0.01        | 0.9411    | 0.0164    |
| r correlation | -0.4974     | 0.0218    | -0.8029   |

**Table S2.** Human (H) and mouse (M) specific primers used for single oocyte qRT-PCR.

|           |                        |
|-----------|------------------------|
| BRCA1 f-H | AGCTGTGTGGTGCTTCTGTGGT |
| BRCA1 r-H | TGGCTGCACAACCACAATTGGG |
| BRCA2 f-H | CTTGCTTTCAAATTGGCACTGA |
| BRCA2 r-H | GTTTAAAAGGGCATAGGCTCTG |
| Rad51 f-H | TAGCAAAGGGAATGGGTCTGC  |
| Rad51 r-H | GCACAAGACTCCATAACCAAAC |
| ATM f-H   | TGCTCAGTGTTGGTGGACAGGT |
| ATM r-H   | TCCATCCTGGGAAAAGTCGGCT |
| Mre11 f-H | AATAGCGCAGTGTCTGGATGC  |
| Mre11 r-H | CAGAAGCACCACTTGTGGCAA  |
| HPRT f-H  | TGACACTGGCAAAACAATGCA  |
| HPRT r-H  | GGTCCTTTTCACCAGCAAGCT  |
| BRCA1 f-M | AGTTGTGATCGTGCAGCCAAGC |
| BRCA1 r-M | ACAAGACGTGCCTTGCACAGCT |
| BRCA2 f-M | ACAGAAGGCTTTTCAGCCGCCA |
| BRCA2 r-M | TTCTGAAATGGCGTTCTCCGCG |
| Rad51 f-M | GGCTGGTTTACTGTGTCTTT   |
| Rad51 r-M | TGGAAATACTCCTGATGCAG   |
| ATM f-M   | TGGGTGGACAGGTGAACTTGCT |
| ATM r-M   | ACCAAGCTTTCCATCCTGGGA  |
| Mre11 f-M | TCTGGCTCACGCTTCCACAACA |

|           |                         |
|-----------|-------------------------|
| Mre11 r-M | TTTTTCAGGCATCTCGGGGCTGT |
| GAPDH f-M | CTGGAGAAACCTGCCAAGTA    |
| GAPDH r-M | TGTTGCTGTAGCCGTATTCA    |

**Table S3.** Primers used for genotyping BRCA-deficient mice.

|      |                                         |
|------|-----------------------------------------|
| B004 | CTG GGT AGT TTG TAA GCA TGC             |
| B005 | CAA TAA ACT GCT GGT CTC AGG             |
| B007 | ATC GCC TTC TAT CGC CTT CTT GAC GAG TTC |
| B016 | GGA GGA GGA GGA GTT GTT GA              |
| B017 | ATC TCG TTC TCT CCA CTC CA              |
| B018 | CAA AAA AGC CCA GAT GAT GAG             |

**Table S4.** Specific BRCA mutations in study participants.

| Patient No | BRCA Gene | Specific mutation*              |
|------------|-----------|---------------------------------|
| 1          | 1         | 185delAG                        |
| 2          | 1         | 187delAG                        |
| 3          | 1         | 187delAG                        |
| 4          | 1         | 187delAG                        |
| 5          | 1         | 187delAG                        |
| 6          | 1         | 187delAG                        |
| 7          | 1         | 187delAG                        |
| 8          | 1         | 448insA                         |
| 9          | 1         | 2388delG                        |
| 10         | 1         | 3875del4                        |
| 11         | 1         | 5385insC                        |
| 12         | 1         | exons14-20del26kb               |
| 13         | 1         | 3875del4                        |
| 14         | 1, 2      | 1: 5382insC, 2: 6174delT        |
| 15         | 1, 2      | 1: 5382insC, 2: S1179N(37640>A) |
| 16         | 2         | 6174delT                        |
| 17         | 2         | 6174delT                        |
| 18         | 2         | 6174delT                        |
| 19         | 2         | 3951delT                        |
| 20         | 2         | 4265delCT                       |
| 21         | 2         | 5682delA                        |

|    |   |                   |
|----|---|-------------------|
| 22 | 2 | C738X(2442T to A) |
| 23 | 2 | L2745V(6251A>G)   |
| 24 | 2 | 3573delT          |

\*Four subjects with mutations of clinical unknown significance were excluded and not reported in this table.
